# Supplementary material for: Early stabilization of the uncemented Symax hip stem in a 2-year RSA study
Source: PubMed Central journal article supplement (PMC7144261; doi:10.1080/17453674.2019.1709956), 2020-01-13
Supplement: IORT_A_1709956_SM0028.pdf [file IORT_A_1709956_SM0028.pdf]

## Supplementary data

Table 3. Clinical outcomes as mean (CI) HHS, OHS, WOMAC, and EQ-5D over time

| Score/subscore       | Preoperatively | 3 months                    | 6 months                    | 1 year         | 2 years                     |
|----------------------|----------------|-----------------------------|-----------------------------|----------------|-----------------------------|
| HHS                  | 63 (33 to 93)  | 96 (82 to 110) <sup>a</sup> | 98 (91 to 105) <sup>a</sup> | 98 (90 to 107) | 99 (92 to 105) <sup>a</sup> |
| OHS                  | 37 (22 to 53)  | 23 (7 to 39) <sup>a</sup>   | 20 (6 to 34) <sup>a</sup>   | 19 (5 to 33)   | 18 (5 to 31) <sup>a</sup>   |
| WOMAC                |                |                             |                             |                |                             |
| Total                | 50 (13 to 86)  | 17 (-8 to 41) <sup>a</sup>  | 13 (-13 to 39) <sup>a</sup> | 12 (-14 to 38) | 10 (-14 to 34)              |
| Pain                 | 10 (2 to 18)   | 2 (-3 to 7) <sup>a</sup>    | 2 (-4 to 7)                 | 2 (-4 to 8)    | 1 (-4 to 7)                 |
| Stiffness            | 4 (0 to 8)     | 2 (-1 to 5) <sup>a</sup>    | 2 (-1 to 5) <sup>a</sup>    | 1 (-1 to 4)    | 1 (-1 to 4)                 |
| Physical functioning | 36 (10 to 62)  | 12 (-6 to 30) <sup>a</sup>  | 9 (-10 to 28) <sup>a</sup>  | 9 (-10 to 27)  | 7 (-11 to 25)               |
| EQ-5D                |                |                             |                             |                |                             |
| Index                | 69 (42 to 96)  | 88 (68 to 107) <sup>a</sup> | 91 (72 to 110) <sup>a</sup> | 91 (72 to 110) | 93 (75 to 111)              |
| VAS                  | 67 (26 to 108) | 83 (56 to 109) <sup>a</sup> | 84 (58 to 110)              | 84 (55 to 113) | 87 (58 to 116) <sup>a</sup> |

<sup>a</sup> Indicates Wilcoxon signed-rank test p-value < 0.05 compared with the preceding clinical outcome.

Table 4. Spearman's rho correlation coefficients (CC), with p-values, for correlation between Y-translation and Y-rotation at 4 weeks and clinical outcomes (HHS, OHS, WOMAC, and EQ-5D) after 2 years

| Score/subscore | CC Y translation |         | CC Y rotation |         |
|----------------|------------------|---------|---------------|---------|
|                | translation      | p-value | rotation      | p-value |
| HHS            | 0.013            | 0.9     | -0.22         | 0.2     |
| OHS            | 0.11             | 0.5     | 0.080         | 0.7     |
| WOMAC          | 0.068            | 0.7     | 0.072         | 0.7     |
| EQ-5D          |                  |         |               |         |
| Index          | -0.063           | 0.7     | -0.21         | 0.3     |
| VAS            | 0.062            | 0.7     | -0.27         | 0.1     |

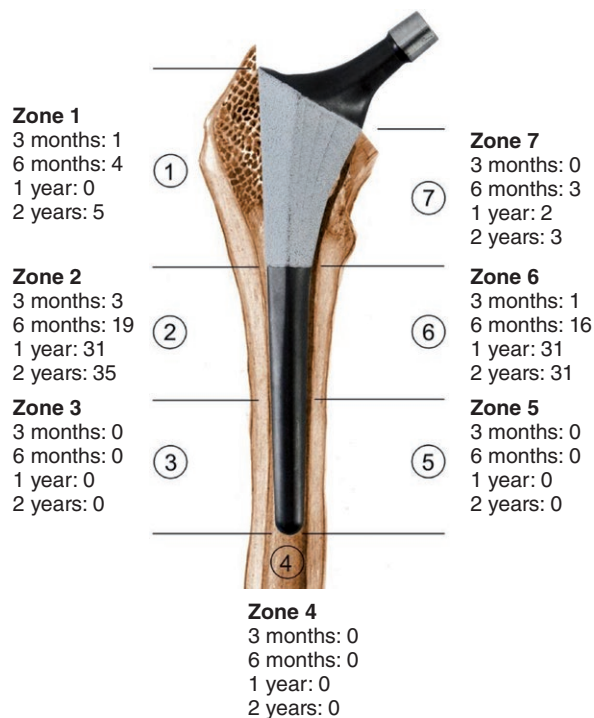

Figure 4. Outcomes of radiographic evaluation: number of patients per Gruen zone with cancellous hypertrophy ("spotweld formation").
